# Supplementary material for: Charge density waves in individual nanoribbons of orthorhombic-TaS3
Source: Royal Society of Chemistry journal article supplement (doi:10.1039/c5cp03351a), 2015-01-01
Supplement: c5cp03351a1.pdf [file c5cp03351a1.pdf]

## Charge Density Waves in Individual Nanoribbons of Orthorhombic-TaS<sub>3</sub>

Katie E. Farley,<sup>1,2#</sup> Zhenzhong Shi,<sup>3#</sup> G. Sambandamurthy,<sup>3\*</sup> and Sarbajit Banerjee<sup>1\*</sup>

*1Department of Chemistry, Texas A&M University, College Station, TX 77842;banerjee@chem.tamu.edu*

*2Department of Materials Science and Engineering, Texas A&M University, College Station, TX 77842-3012*

*3Department of Physics, University at Buffalo, The State University of New York, Buffalo, NY 14260; sg82@buffalo.edu*

*# these authors contributed equally to this work*

## Supporting Information

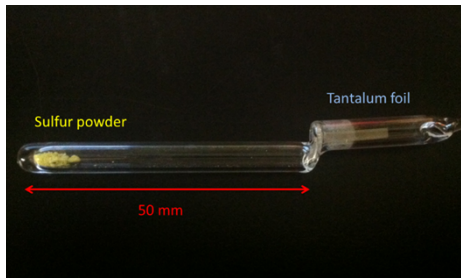

Figure S1: Reaction vessel used in chemical vapor transport synthesis of  $\text{TaS}_3$  nanowires. The constriction prevents the direct mixing of the precursors and ensures that only sublimed S can react with the Ta surface.

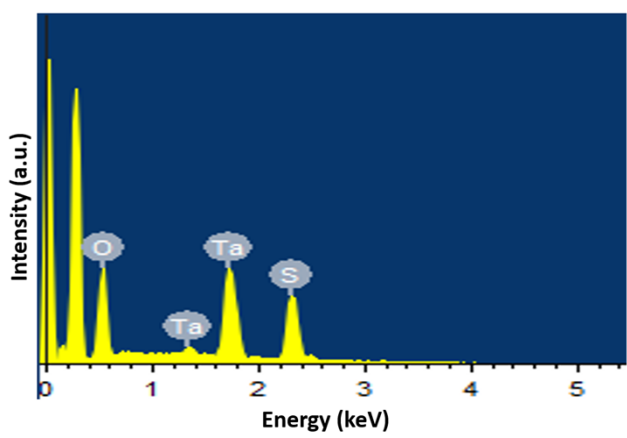

Figure S2: Energy dispersive X-ray analysis acquired indicates a Ta:S ratio of 1:3.1.
